# Supplementary material
Source: publisher figshare collection journal article supplement (https://acs.figshare.com/ndownloader/files/3713119)
Supplement: Supplementary file 1 [file 3713119]

# **Supplementary Material: Discovery of Vibegron: A Potent and Selective $\beta_3$ Adrenergic Receptor Agonist for the Treatment of Overactive Bladder**

*Scott D. Edmondson,\* Cheng Zhu, Nam Fung Kar, Jerry Di Salvo, Hiroshi Nagabukuro, Beatrice Sacre-Salem, Karen Dingley, Richard Berger, Stephen D. Goble, Gregori Morriello, Bart Harper, Christopher R. Moyes, Dong-Ming Shen, Liping Wang, Richard Ball, Aileen Fitzmaurice, Tara Frenkl, Loise N. Gichuru, Sookhee Ha, Amanda L. Hurley, Nina Jochnowitz, Dorothy Levorse, Shruty Mistry, Randy R. Miller, James Ormes, Gino M. Salituro, Anthony Sanfiz, Andra S. Stevenson, Katherine Villa, Beata Zamlynny, Stuart Green, Mary Struthers, and Ann E. Weber*

Merck Research Laboratories, 2015 Galloping Hill Road, PO Box 539, Kenilworth, New Jersey 07033  
United States

[scott.edmondson@merck.com](mailto:scott.edmondson@merck.com)

## **RECEIVED DATE**

$\beta_3$  Adrenergic Receptor Agonists, Overactive Bladder, Vibegron

\*To whom correspondence should be addressed. Scott D. Edmondson, Merck Research Laboratories, Mail Code K15-MN2, 2015 Galloping Hill Rd., Kenilworth, NJ 07033-0539. Tel: (908) 740-0287. E-mail: [scott.edmondson@merck.com](mailto:scott.edmondson@merck.com).

### A) Crystal data and structure refinement for Compound 7 (Vibegron) [CCDC 1421635]

A single crystal grown from acetonitrile and water by slow evaporation was selected for single crystal X-ray data analysis. The crystal was a prismatic needle with dimensions of 0.41mm x 0.13mm x 0.06mm. Data collection was performed at 100K on an Oxford Gemini system with a Cu radiation source. The unit cell was determined to be monoclinic in space group  $P2_1$  with one molecule in the asymmetric unit. Crystallographic data is summarized in Table 1. Absolute configuration was supported by anomalous-dispersion effects in diffraction measurements on the crystal yielding a Flack parameter of -0.07(17). Results supported that the stereochemistry of Compound 7 was as shown in Scheme 1. Figure 1 shows an ORTEP representation of Compound 7 with thermal ellipsoid set at the 50% probability level. Full structural details have been deposited with the Cambridge Crystallographic Data Centre (CCDC 1421635).

**Figure A1:** ORTEP representation of Compound 7 (Vibegron) with thermal ellipsoids set at the 50% probability level.

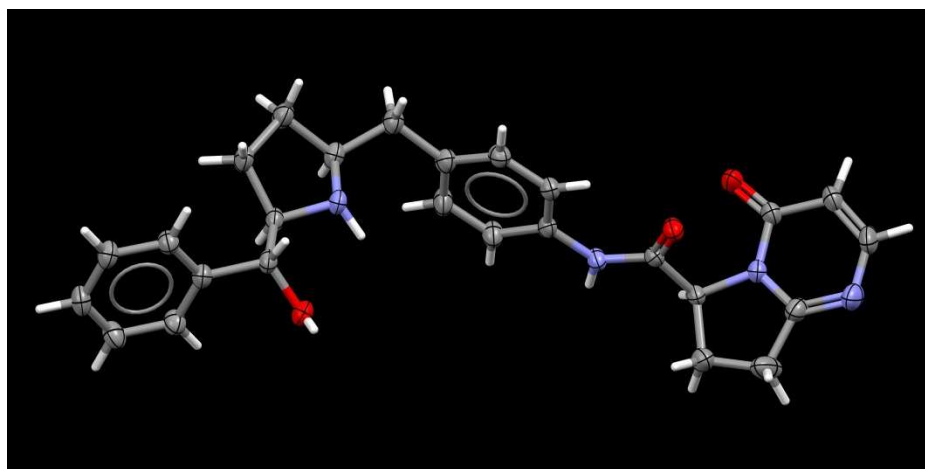

**Scheme A1:** Scheme showing the absolute configuration of Compound 7 (Vibegron).

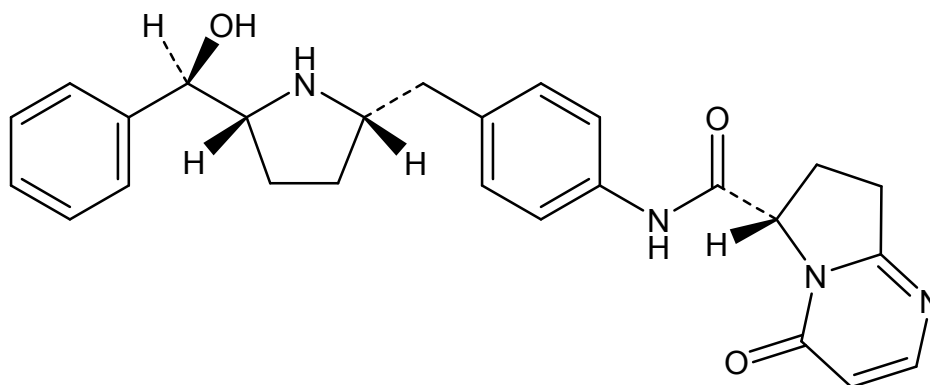

**Table A1.** Crystal data and structure refinement for Compound 7 (Vibegron)

|                                   |                                                                  |                          |
|-----------------------------------|------------------------------------------------------------------|--------------------------|
| Empirical formula                 | $C_{26}H_{28}N_4O_3$                                             |                          |
| Formula weight                    | 444.53                                                           |                          |
| Temperature                       | 100(2) K                                                         |                          |
| Wavelength                        | 1.54178 Å                                                        |                          |
| Crystal system                    | Monoclinic                                                       |                          |
| Space group                       | $P2_1$                                                           |                          |
| Unit cell dimensions              | $a = 11.832(8)$ Å                                                | $\alpha = 90^\circ$      |
|                                   | $b = 6.3650(19)$ Å                                               | $\beta = 95.35(3)^\circ$ |
|                                   | $c = 15.531(4)$ Å                                                | $\gamma = 90^\circ$      |
| Volume                            | 1164.6(9) Å <sup>3</sup>                                         |                          |
| Z                                 | 2                                                                |                          |
| Density (calculated)              | 1.268 Mg/m <sup>3</sup>                                          |                          |
| Absorption coefficient            | 0.680 mm <sup>-1</sup>                                           |                          |
| F(000)                            | 472                                                              |                          |
| Crystal size                      | 0.06 x 0.12 x 0.41 mm <sup>3</sup>                               |                          |
| Theta range for data collection   | 2.855 to 66.6034°.                                               |                          |
| Index ranges                      | $-14 \leq h \leq 13$ , $-6 \leq k \leq 7$ , $-18 \leq l \leq 18$ |                          |
| Reflections collected             | 19109                                                            |                          |
| Independent reflections           | 3758 [R(int) = 0.0308]                                           |                          |
| Completeness to theta = 66.6°     | 98.6 %                                                           |                          |
| Absorption correction             | Semi-empirical from equivalents                                  |                          |
| Max. and min. transmission        | 0.960 and 0.748                                                  |                          |
| Refinement method                 | Full-matrix least-squares on F <sup>2</sup>                      |                          |
| Data / restraints / parameters    | 3758 / 4 / 299                                                   |                          |
| Goodness-of-fit on F <sup>2</sup> | 1.052                                                            |                          |
| Final R indices [I > 2sigma(I)]   | R1 = 0.0315, wR2 = 0.0837                                        |                          |
| R indices (all data)              | R1 = 0.0327, wR2 = 0.0847                                        |                          |
| Absolute structure parameter      | 0.07(17)                                                         |                          |
| Largest diff. peak and hole       | 0.262 and -0.195 e.Å <sup>-3</sup>                               |                          |

**B) Algorithm for cLog D determinations.**

Calculated Log D determinations (cLog D) were determined as  $AlogD_{pH7.4} - AlogP + cLogP$ , using software from ACD (AlogD and AlogP) and Biobyte (cLogP).
